# Supplementary material
Source: PubMed Central journal article supplement (PMC11500500)
Supplement: jb.00367-24-s0003.pdf [file jb.00367-24-s0003.pdf]

### Figure S3

#### *rarP2*

ATGCAAAAAATATTGTTTAAAGGCCCGAATATAAGTATGAAAAATGAAAAATCCTGATATCAAGGAA  
ATAAAAAACCTTAGCTGACTTACCTTCAGGTACAGGTAGTGAATATTTTATAAAATGTACATGGATCA

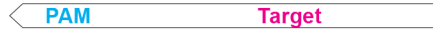

GAGTTTTTCTGTAAACCTACTGATTTAGGTTTATGGGAAAAAATTAATCATATTTTATGCCTGAG  
TCTTCTTACTTATTAATGAATATATTTTCTGATGAAGGTACAACCTCCTGTATTAGATATTACACTA  
CTTAATAAGATACAAAAATAATACCACTGCAAAATCAATGTAATATTGTTTCATATATTTTCTTGTTCAT  
TCAGGAGCCGCTCAACATCATTTAGATTGGATACAGGGCAACATTGTGTTATGCACCTATAATAAG  
GCCAGCGATGCAAAATATTATGCGATTAGCTCAAAATAAATTACGATGCTAGAACAAAAATAACTCC  
TTATTGATTGAATATATAAGAGATCATTTTCATCTATTAGTAGCATCAGATTTTAGTATAAGCTAT  
AAATTAGACAATCAAAATTTATAGTTTTTCTTTAAGTGCTAAATAAAATCAAACAGATGAAAAGCATA  
GAGGAGTTGCCGGCTTTTCTACATAAAGAATATAAAGCTTTTGTAAAAATTTTATGAAAAATTTTCAT  
GCGAAATATCATGAATCATATCCTGAAATATTTAACTTAAATATAGAAAACAAAGCCGAAAGAAATTA  
ACATACGATGACTTAATCAAGGTATTTAGTAGAGCTTTAACCTTAGAAAACATATAATTTTAAATAAA  
TTTTCTTTAAGCAAGATAGAGACTATGTTAAATCAGAAAAGGATTATGTACTGATACTAGTATAAGG  
CACGCTATAGAGCACGGGAATTTCTGAACTATTAATTTGTTTACTTAAATATGGTAATACTAAAAGTC  
AGTACCTATACTCTTGATAAAGGCTATAGAGAAAAGGTGATTTAGCTATTTCTAAAAGCTGTACTTGAG  
CATAGTACTACAAAAATAGAACCATATACTCTTGATAAAGGCTATAGAGAAAAGGTGATTTAGCTATT  
CTAAAAGCTGTACTTGAGCATAGTACTACAAAAATAGAATCATATAAATCTTGATAAAGGCTATAGAG  
GAAGGTGATTTAGCTATTTCTAAAAGCTGTACTTGAGCATAGTACTACAAAAATAGAACCATATACT  
CTTGATAAAGGCTATAGAGAAAAGGTGATTTAGCTATTTCTAAAAGCTGTACTTGAGCATAGTACTACA  
AAAAATAGAATCATATAAATCTTGATAAAGGCTATAGAGGAAGGTGATTTAGCTATTTCTAAAAGCTGTA  
CTTGAGCATAGTACTACAAAAATAGAACCATATAAATCTTGGTAAGGTTATAGAGAAAAGGTGATTTA  
GCTATTTCTAAAAGCTGTACTTGAGCATAGTACTACAAAAATAGAATTATATAAATCTTGGTAAGGCT  
ATAGAGAAAAGGTGATTTAGCTATTTCTAAAAGCTATACTTGAGCATAGTACTACAAAAATAGAATTA  
TATAAATCTTGGTAAGGCTATAGAGAAAAGGTGATTTAGCTATTTCTAAAAGCTGTACTTGAGCATAGT  
ACTACAAAAATAGCATTATATAAATCTTGGTGAGGCTATAGAGGAAGGTGATTTAGCTATTTCTAAA  
GCTGTACTTGAGCATAGTACTATAGAGGTAGGTAGCTCTAATATTTATACGGCAGAAAGAGACGCAT  
AATTTAGACGTTATCGAATTAGTAAAAAAATATTTCTACTATAAAATACTATTACATCTGAAGAAAAC  
ACTATAGATACAACACTTACTGTGGTAGAAGAAGTACCGGCATTAGGAGAGGGGACAGAGGGAGTA  
TAA

#### *rapL*

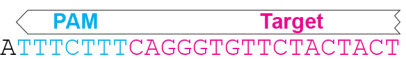

ATGAAAAATTTTATTTGGGCAATAATATTTTAAATACCAATA  
CATGATGTAGCTAGAAAGGTTAAAGCATTCGCAAGATATAGCAACTCAAAAAAATTTTTCAGATGGGG  
CTAGTAAACGGTGGTGATTTTACTCTTACGACTTATCAGCGTATTACCGACCCTAACCTACCTTTT  
GTATTCTATATTGAAGGAGATGGACATCTTGGCGATGGATCTGCTAATTCGACAACCCCTACTCCC  
GTTAATCCGATGCTCTTAAAGCTTGCCTACAATGGATAAAAAGACCGAATATTGTTTATATAGCAAGA  
CCTTGCCAATATACTCCCTTTAGACATGAACCCAAAAATGCATTAGCGATTATTGGTTAGATAAAAAGA  
ATGGGGCAGGAAGTTGTAGATTCAATTAACAATGTAATAAAATATTATCAATAACGGACAAAAATTT  
AGCTTAGTCGGCTTCTCCGGTGGCGGGGGCTTACAATATTAATTGCCGCTCAAAAAATAGTAATGTT  
AAAGATATTATAACGATTGCCGGTAATTTAGATACAAAAAGTTTGATAAAATATCATAATTATCGT  
GGTTACTTAGTTAAATCCTTAAACCCGATAAAATATGCAAAACAGGTTAATAATATCCCTCAATTA  
CATCTCTCCGGCATAGATGACAAAAGAGTCCCGCCTTTCATAGCAGCACTTTACGTAAGCAAGT  
AACTCACCGTGTGTAAGAAAAGCAAACTTTTCCCTAATATTTCTCATACAAAAGGTTGGGATAAAGTT  
TGGTCTAATATATTAGAGATTCCCTGATTTGTAATTAG
