# Supplementary material
Source: PubMed Central journal article supplement (PMC11500500)

Figure S1

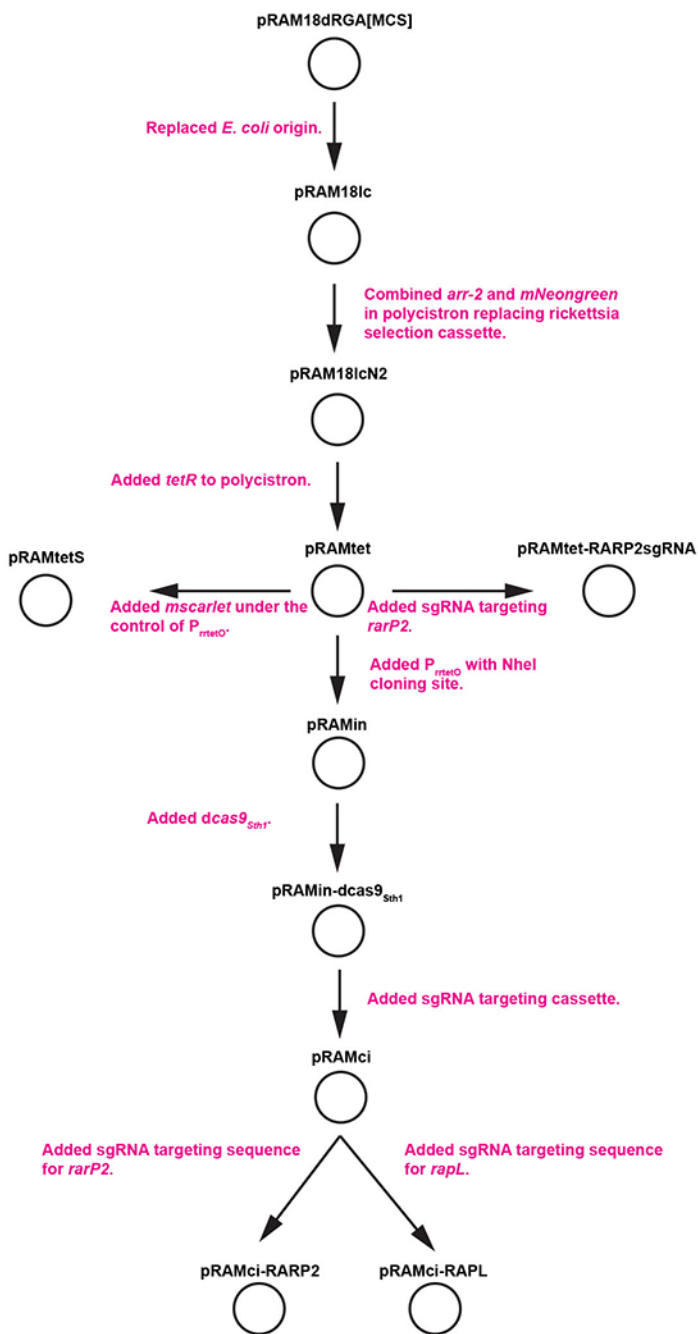

Supplement: jb.00367-24-s0001.pdf [file jb.00367-24-s0001.pdf]

**Figure S2**

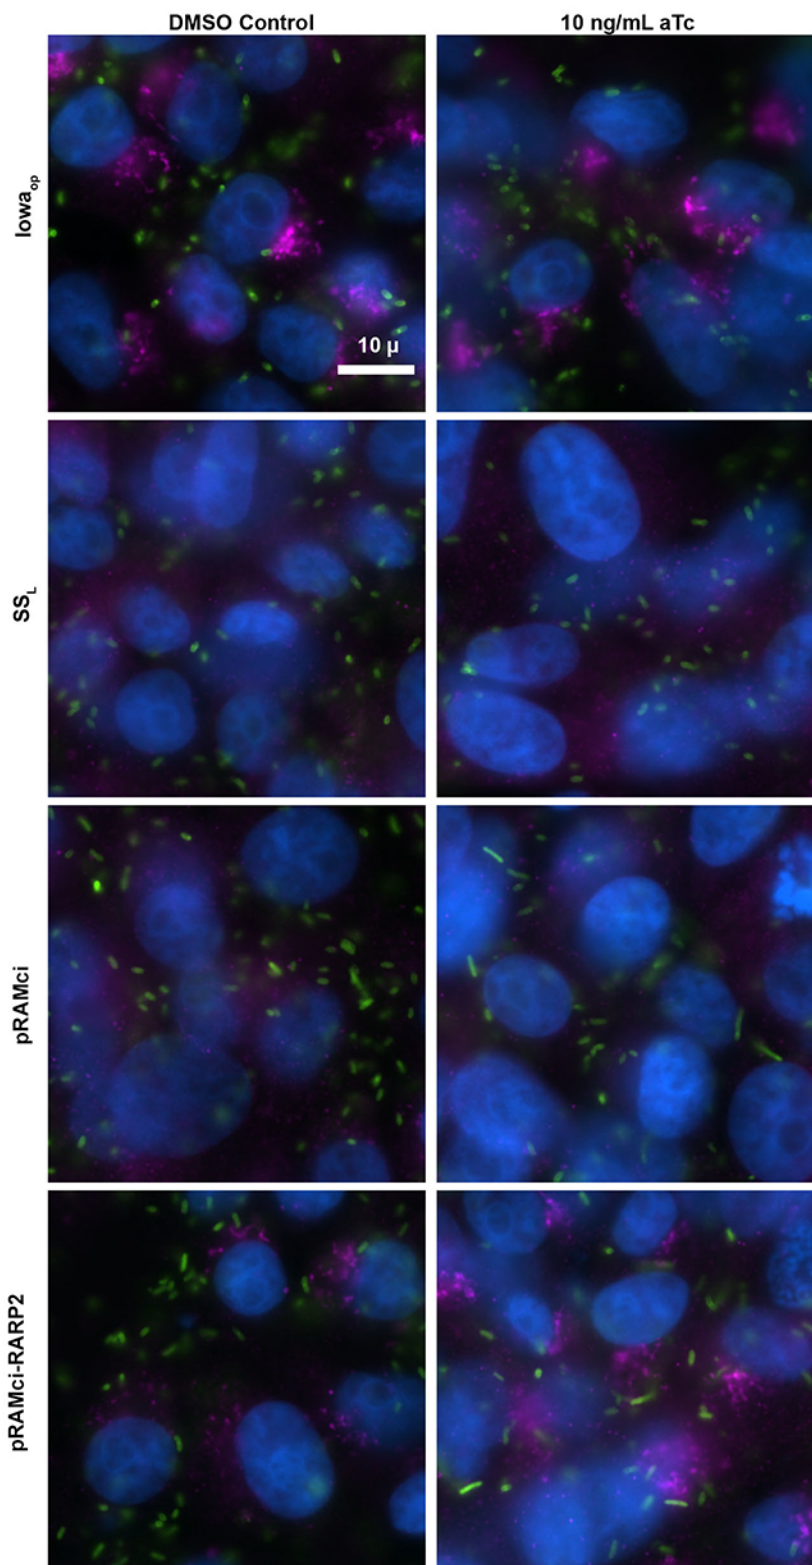

Supplement: jb.00367-24-s0002.pdf [file jb.00367-24-s0002.pdf]
